# Supplementary material for: Clostridium difficile Toxin CDT Induces Formation of Microtubule-Based Protrusions and Increases Adherence of Bacteria
Source: PLOS journal article supplement (doi:10.1371/journal.ppat.1000626), 2009-10-15

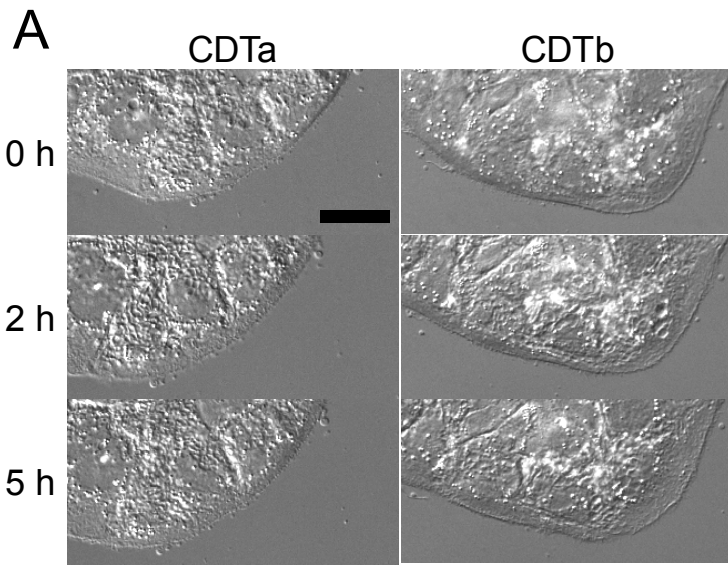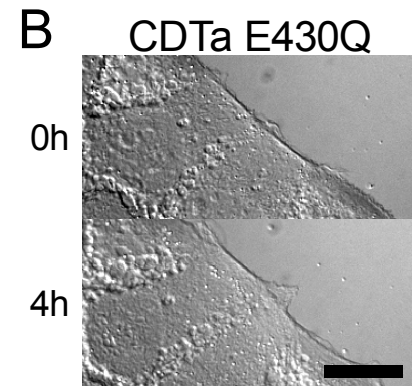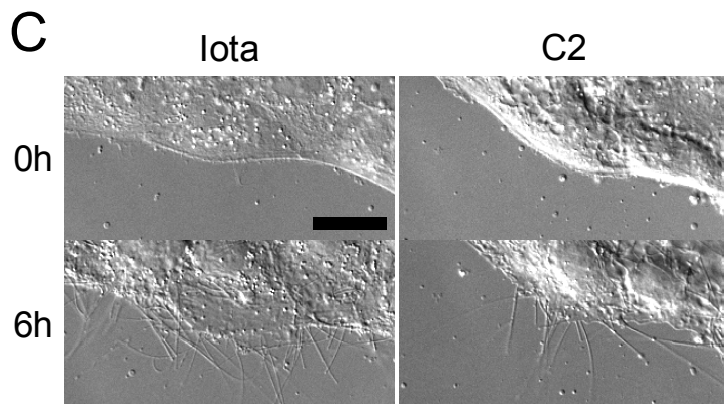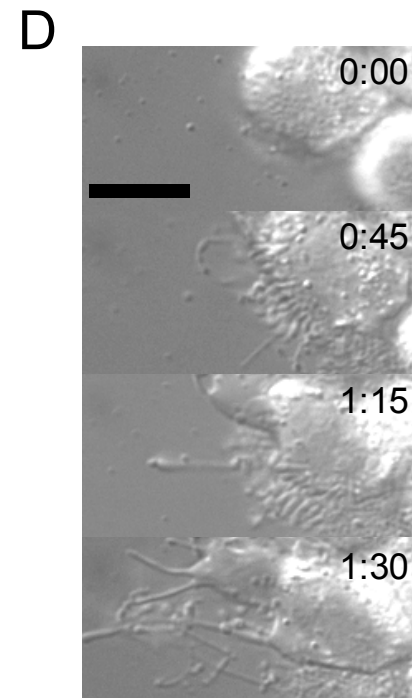

Supplement: S1 (10.1371/journal.ppat.1000626.s001) [file journal.ppat.1000626.s001]
